# Supplementary material for: Neo-epitope of Gasdermin D C-terminal fragment detection identifies pyroptosis in sepsis: an exploration study
Source: Research Square preprint supplement (doi:10.21203/rs.3.rs-6348831/v1), 2025-05-07
Supplement: Supplementary file 1 [file 942d33d948679186e14556a9.docx]

Table S1 Summary of technical performance for GSDMD-CT CLIA immunoassay

| **Parameters** | **Specifications** |
| --- | --- |
| Linear range (pg/mL) | 1-3000 |
| Accuracy, % | 85-115% |
| LoD (pg/ml) | 1 |
| LoB (pg/ml) | <0.5 |
| LoQ (pg/ml) | 3 |
| Intra-assay CV, % | <8% |
| Inter-assay CV, % | <15% |
| Serum GSDMD-CT stability, 2 days at RT, % (n=3) | 103.7% |
| Heparin plasma GSDMD-CT stability, 2 days at RT, % (n=3) | 104.9% |

GSDMD-CT: carboxyl-terminal of Gasdermin D, CLIA: chemiluminescence immunoassay, LoD: limit of detection, LoB: limit of blank, LoQ: limit of quantification, CV: coefficient of variation
